# Supplementary material for: Coordination of histone chaperones for parental histone segregation and epigenetic inheritance
Source: PubMed Central journal article supplement (PMC10982699; doi:10.1101/gad.351278.123), 2024-02-01
Supplement: Supplementary_Figures.pdf [file Supplementary_Figures.pdf]

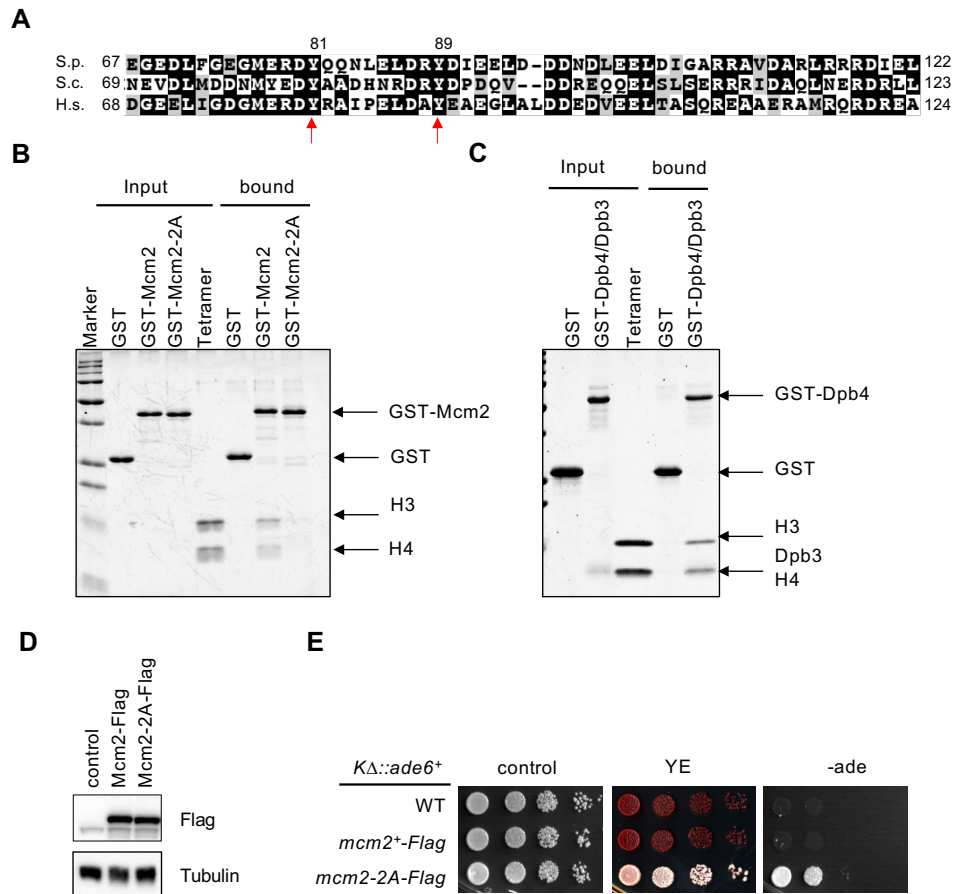

**Figure S1. Mcm2 and Dpb3/4 interact with histone H3-H4 tetramers**

(A) Sequence alignment of Mcm2-HBD from different species. Red arrows indicate residues mutated in *mcm2-2A*.

(B) Recombinant fission yeast H3-H4 tetramers were incubated with GST, GST-Mcm2-HBD, or GST-Mcm2-HBD-2A immobilized on glutathione beads and washed extensively. The eluted proteins were resolved by SDS-PAGE and stained with Coomassie blue.

(C) Recombinant fission yeast H3-H4 tetramers were incubated with GST or the GST-Dpb4/Dpb3 complex immobilized on glutathione beads and washed extensively. The eluted proteins were resolved by SDS-PAGE and stained with Coomassie blue.

(D) Protein extracts prepared from indicated yeast strains were resolved by SDS-PAGE and analyzed by western blot with Flag (top) and Tubulin (bottom) antibodies.

(E) Serial dilution analysis of indicated strains to measure the expression of *KΔ::ade6<sup>+</sup>*.

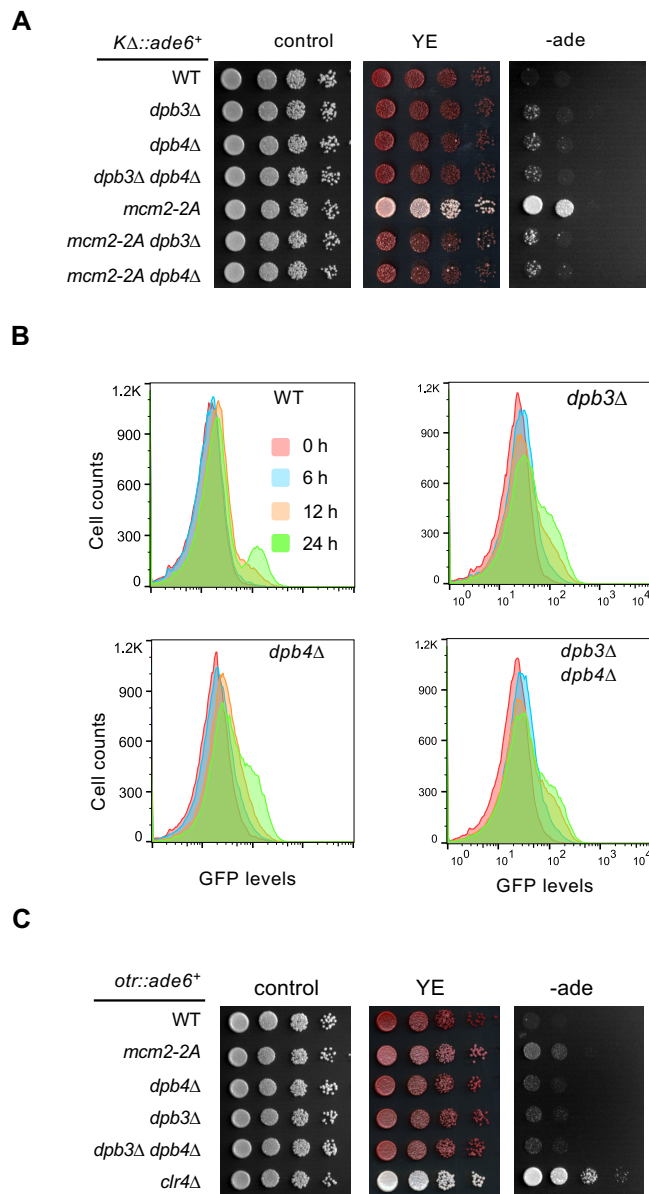

**Figure S2. *dpb3Δ* and *dpb4Δ* have similar phenotypes**

(A) Serial dilution analysis of indicated strains to measure the expression of *KΔ::ade6<sup>+</sup>*.

(B) Flow cytometry analysis of GFP expression at different time points after tetracycline addition. All strains are in an *epe1Δ* background.

(C) Serial dilution analysis of indicated strains to measure the expression of *otr::ade6<sup>+</sup>*.

**A**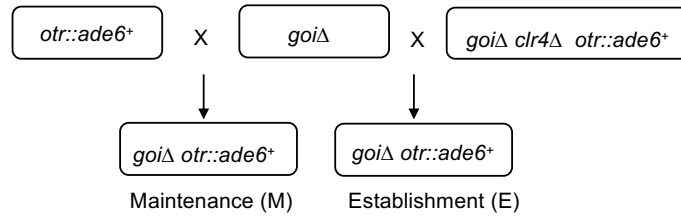**B**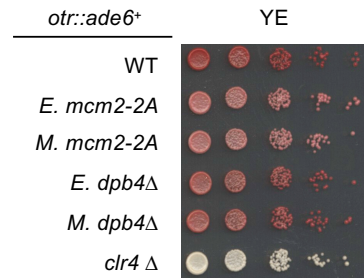

**Figure S3. Mcm2 and Dpb4 are not required for heterochromatin establishment**  
 (A) Diagram of genetic crosses to obtain establishment (E) and maintenance strains (M).  
 (B) Serial dilution analysis of indicated strains to measure the expression of  $otr::ade6^+$ .

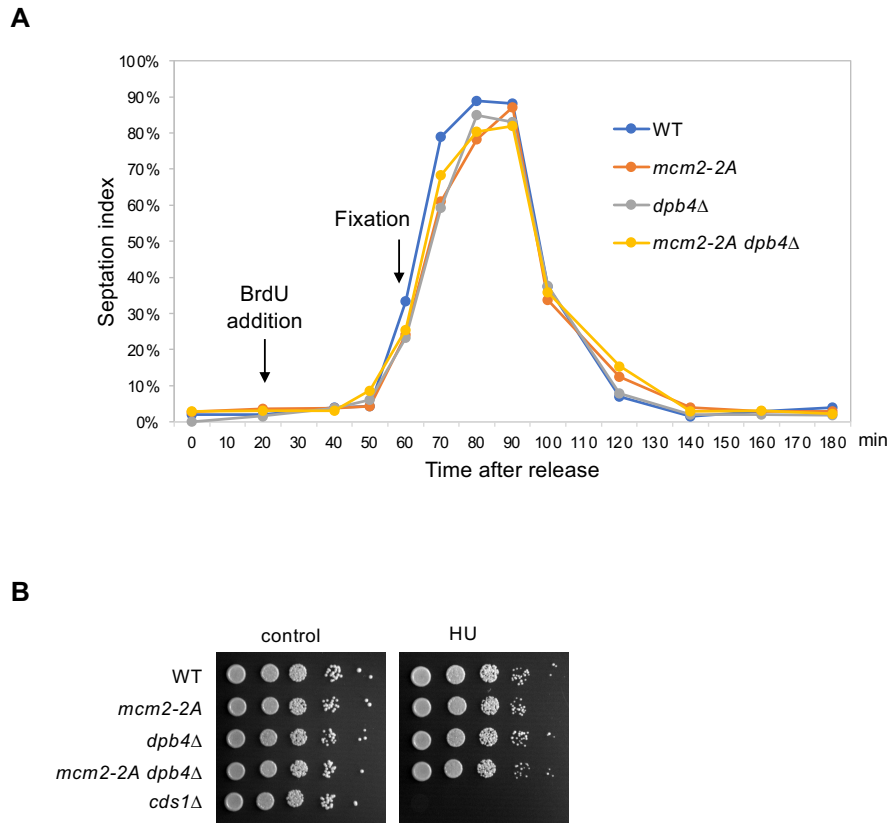

**Figure S4. Mcm2 and Dpb3/4 mutants do not affect S phase progression.**

(A) The septation index of indicated yeast strains was determined following synchronization with the *cdc25-22* temperature sensitive mutant. Cells were cultured at 36°C to arrest them at G2/M, then shifted to 25°C (time 0) to enter the cell cycle. BrdU was added at 20 minutes and cells were fixed at 60 minutes, corresponding to early S phase.

(B) Serial dilution analysis of indicated strains to measure their sensitivity to 5 mM of HU.

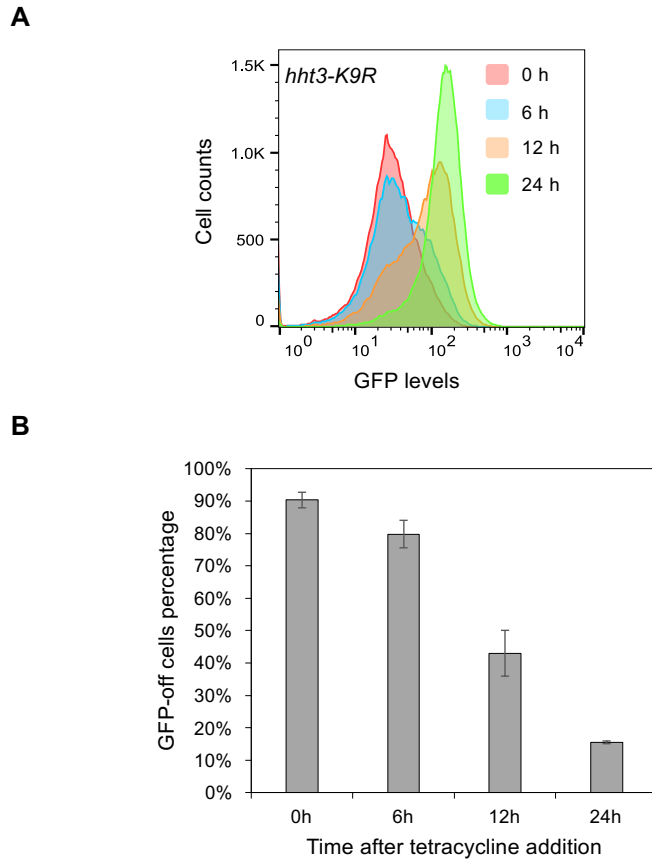

**Figure S5. Hht3-K9R affects heterochromatin inheritance**

(A) Flow cytometry analysis of GFP expression at different time points following tetracycline addition. All strains are in an *epe1Δ* background.

(B) Quantification of the percentage of cells maintaining low GFP expression at different time points after tetracycline addition. Data are presented as mean  $\pm$  SD of two biological replicates. All strains are in an *epe1Δ* background.

Figure S6

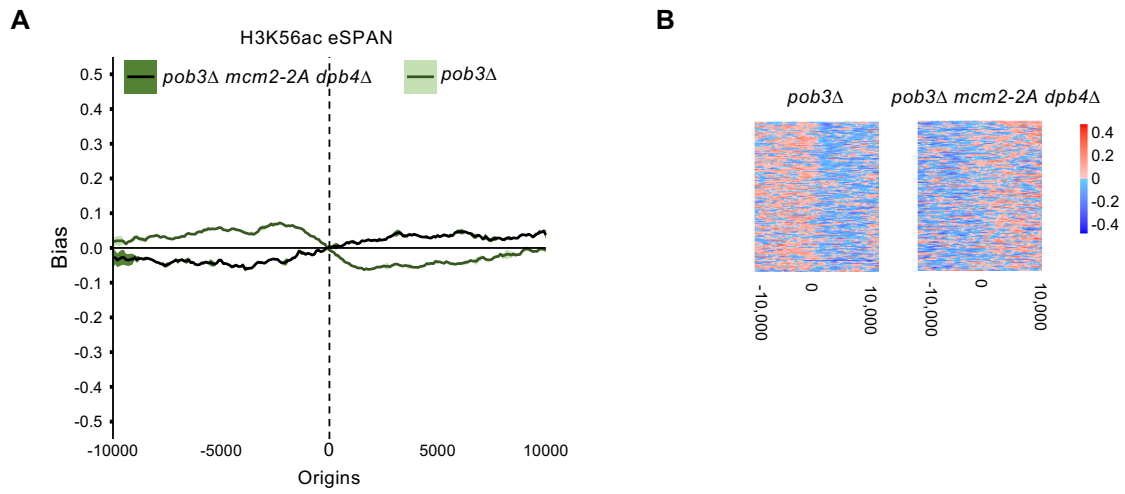

**Figure S6. H3K56ac eSPAN of *pob3Δ* mirrors H3K4me3 eSPAN**

(A) eSPAN analysis of H3K56ac bias levels at replication origins. The shading of the bias line plot is the 95% confidence interval of mean value of at least two biological replicates, which is mean  $\pm$  2 folds of the standard error.

(B) Heatmaps of H3K4me3 bias at each of the 162 replication origins analyzed.
